# Supplementary material for: Sulfidation attenuates the adverse impacts of metallic nanoparticles on anammox from the perspective of chronic exposure
Source: Royal Society of Chemistry journal article supplement (doi:10.1039/d0en00219d), 2020-01-01
Supplement: d0en00219d1.pdf [file d0en00219d1.pdf]

Supplementary materials for

**Sulfidation Attenuates the Adverse Impacts of Metallic Nanoparticles  
on Anammox from the Perspective of Chronic Exposure**

**Zheng-Zhe Zhang<sup>a,b</sup>, Yu Zhang<sup>b</sup>, Ya-Fei Cheng<sup>a</sup>, Ren-Cun Jin<sup>a\*</sup>**

*<sup>a</sup> Laboratory of Water Pollution Remediation, School of Life and Environmental  
Sciences, Hangzhou Normal University, Hangzhou 311121, China*

*<sup>b</sup> State Key Laboratory of Pollution Control and Resources Reuse, School of  
Environmental Science and Engineering, Tongji University, Shanghai 200092, China*

\*Corresponding author: Ren-Cun Jin

Tel.: +86-571-28861265; Fax: +86-571-28865333

E-mail address: jrczju@aliyun.com

**Table S1 Composition of the synthetic wastewater.**

| Composition                                     | Concentration                |
|-------------------------------------------------|------------------------------|
| MgSO <sub>4</sub> •7H <sub>2</sub> O            | 58.6 mg L <sup>-1</sup>      |
| NaH <sub>2</sub> PO <sub>4</sub>                | 10 mg L <sup>-1</sup>        |
| NaHCO <sub>3</sub>                              | 840 mg L <sup>-1</sup>       |
| CaCl <sub>2</sub> •2H <sub>2</sub> O            | 73.5 mg L <sup>-1</sup>      |
| Trace element I <sup>a</sup>                    | 1.25 mL L <sup>-1c</sup>     |
| Trace element II <sup>b</sup>                   | 1.25 mL L <sup>-1c</sup>     |
| (NH <sub>4</sub> ) <sub>2</sub> SO <sub>4</sub> | Add as required <sup>d</sup> |
| NaNO <sub>2</sub>                               | Add as required <sup>d</sup> |

<sup>a</sup> The composition of trace element solution I was 5 g L<sup>-1</sup> EDTA and 9.14 g L<sup>-1</sup> FeSO<sub>4</sub>•7H<sub>2</sub>O.

<sup>b</sup> The trace element solution II was composed of 15 g L<sup>-1</sup> EDTA, 0.014 g L<sup>-1</sup> H<sub>3</sub>BO<sub>4</sub>, 0.99 g L<sup>-1</sup> MnCl<sub>2</sub>•4H<sub>2</sub>O, 0.25 g L<sup>-1</sup> CuSO<sub>4</sub>•5H<sub>2</sub>O, 0.43 g L<sup>-1</sup> ZnSO<sub>4</sub>•7H<sub>2</sub>O, 0.21 g L<sup>-1</sup> NiCl<sub>2</sub>•6H<sub>2</sub>O, 0.22 g L<sup>-1</sup> NaMoO<sub>4</sub>•2H<sub>2</sub>O and 0.24 g L<sup>-1</sup> CoCl<sub>2</sub>•6H<sub>2</sub>O.

<sup>c</sup> 1.25 mL of trace element solutions I and II were added per liter of wastewater.

<sup>d</sup> Equimolar ammonium and nitrite were supplied.

**Table S2 Primers used for quantitative PCR.**

| Target gene   | Primer         | Sequence (5'-3')       | Annealing        |
|---------------|----------------|------------------------|------------------|
|               |                |                        | Temperature (°C) |
| Bacterial 16S | 338F           | ACTCCTACGGGAGGCAGCAG   | 55               |
| rRNA          | 518R           | ATTACCGCGGCTGCTGG      |                  |
| Anammox       | 368F           | TTCGCAATGCCCGAAAGG     | 56               |
| 16S rRNA      | 820R           | AAAACCCCTCTACTTAGTGCCC |                  |
| <i>hdh</i>    | <i>hdh</i> _1F | GGTGGTTTGAGGGGTTC      | 55               |
|               | <i>hdh</i> _2R | TATGGCGACCTCTGTGCATC   |                  |
